# Supplementary material for: In Vitro Propagation of an Endangered Helianthus verticillatus by Axillary Bud Proliferation
Source: MDPI journal article supplement (doi:10.3390/plants9060712), 2020-06-03
Supplement: s1 [file s1]

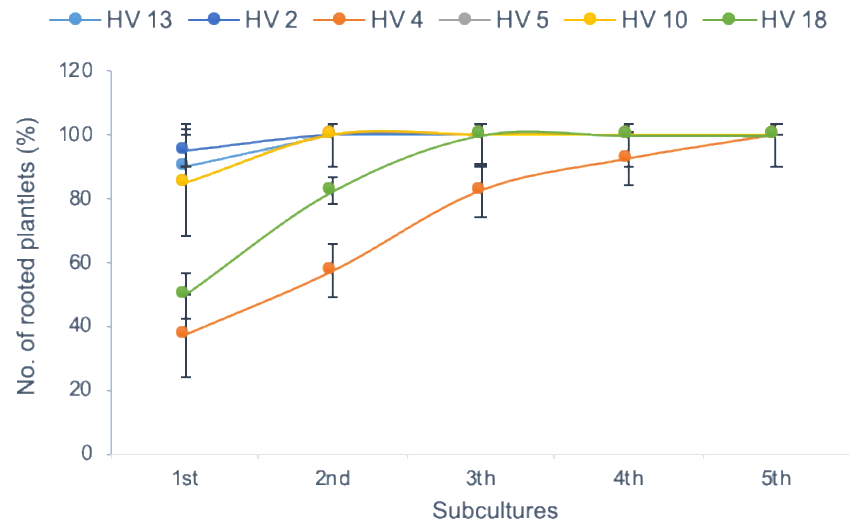

**Figure S1.** Efficiency of rooting of shoots from six plants of *Helianthus verticillatus* after subsequent cycles of 4-week long subcultures on an auxin-free  $\frac{1}{2}$  MS (regeneration medium). Data are the average of raw counts of rooted plantlets from the shoots induced from the nodal segments on all induction media ( $n = 40$ ). Error bars represent standard deviation.
