# Supplementary material for: In Vitro Propagation of an Endangered Helianthus verticillatus by Axillary Bud Proliferation
Source: MDPI journal article supplement (doi:10.3390/plants9060712), 2020-06-03
Supplement: s1 [file s1]

**Table S3.** Microsatellite loci used to examine the genetic uniformity of regenerants and their respective donor plants of *Helianthus verticillatus*.

| Core Loci <sup>A</sup> | Renamed Loci <sup>B</sup> | Forward and Reverse Primers 5'-3'                         | Repeat Motif        | Number of Alleles | Allele Size Range (bp) |
|------------------------|---------------------------|-----------------------------------------------------------|---------------------|-------------------|------------------------|
| BL0006                 | HV006                     | F: CATGGGTGATCAATGGAGTG<br>R: CGGCACATAACAAGTGCTTC        | (gtga) <sub>3</sub> | 2                 | 230–265                |
| BL0013                 | HV012                     | F: CGAGACGGTTAAGAGCTTGC<br>R: GGTGTACAACCAACTCACACC       | (gtta) <sub>3</sub> | 4                 | 337–349                |
| BL0022                 | HV017                     | F: ACTTACCGTTGCATTTGGTG<br>R: GCTTATCCCTAGAACACGATTACAG   | (taa) <sub>4</sub>  | 2                 | 105–108                |
| BL0015                 | HV024                     | F: AATTGGAGCGGATGGTATTG<br>R: AATATCTCTTATTTCAATAGTCCAACG | (atg) <sub>4</sub>  | 1                 | 360                    |
| BL0019                 | HV026                     | F: GAGTCCTGGCCTGAACAGAG<br>R: CAAACTGCAATGTACCTTCTTGAC    | (gaaa) <sub>3</sub> | 1                 | 296                    |
| BL0024                 | HV028                     | F: CTCCCGCACTTCAAGCTAAC<br>R: CATAACCTTTGCGGTTTCC         | (gtaa) <sub>3</sub> | 1                 | 119                    |
| BL0031                 | HV031                     | F: CCGGAAGATAACGACGAGTG<br>R: TCCATCGCTTTCCTAAATC         | (gac) <sub>4</sub>  | 1                 | 424                    |
| BL0033                 | HV033                     | F: GGGAGTTACACGCCTCCAG<br>R: CACAACCATACGCCATCAAG         | (cac) <sub>4</sub>  | 2                 | 265–268                |
| BL0034                 | HV034                     | F: GGTCGTCTACTACGGCTTCG<br>R: TAACCGAACGACCATTCTTC        | (tgtt) <sub>4</sub> | 3                 | 154–162                |
| BL0037                 | HV037                     | F: GGTTAGGGTGAGGGTGGTG<br>R: AAGCCATAGTAAGTTCCTCTTACAAAC  | (tgca) <sub>3</sub> | 3                 | 152–176                |
| BL0041                 | HV041                     | F: ACATTTGGACGTTTGGAAGC<br>R: TCCATCGAGATGTTGACACG        | (ctt) <sub>4</sub>  | 1                 | 190                    |
| BL0042                 | HV042                     | F: GGTTACAACGGTGGAAGTCG<br>R: TCCGGTTCACCAATTCATTC        | (ggc) <sub>4</sub>  | 2                 | 368–374                |
| BL0046                 | HV046                     | F: GAACCAACACAACCAAATCC<br>R: TGTCGCTTCAACGCATAAAC        | (aaca) <sub>3</sub> | 1                 | 317                    |
| BL0048                 | HV048                     | F: TTGTGGAGACGGTGAATGAG<br>R: TAACCGAACGACCATTCTTC        | (gaa) <sub>4</sub>  | 1                 | 224                    |

<sup>A</sup>—All core loci taken from Pashley et al. [91]; <sup>B</sup>—Loci renamed by Edwards et al. [5].
