# Supplementary material for: In Vitro Propagation of an Endangered Helianthus verticillatus by Axillary Bud Proliferation
Source: MDPI journal article supplement (doi:10.3390/plants9060712), 2020-06-03
Supplement: s1 [file s1]

**Table S1.** Analysis of Variance (ANOVA) for the parameters examined for the induction of axillary shoots from the nodal stem segments of *Helianthus verticillatus* on a ½ MS containing various concentration of BAP (induction medium).

| Tested Parameters                | Variation Source  | Sum of Squares | F Value | P [Pr(>F)]             |
|----------------------------------|-------------------|----------------|---------|------------------------|
| Axillary bud induction frequency | Genotype          | 17492          | 3.5232  | 0.003997 **            |
|                                  | BAP concentration | 7281           | 7.3323  | 0.007085 **            |
|                                  | BAP × genotype    | 9779           | 1.9696  | 0.082365 <sup>ns</sup> |
| Number of shoots per explants    | Genotype          | 78.26          | 6.8421  | 4.015e-06 ***          |
|                                  | BAP concentration | 13.50          | 5.9023  | 0.01559 *              |
|                                  | BAP × genotype    | 14.90          | 1.3022  | 0.26220 <sup>ns</sup>  |

\*—significant at  $p < 0.05$ ; \*\*—significant at  $p < 0.01$ ; \*\*\*—significant at  $p < 0.001$ ; <sup>ns</sup>—not significant.
