# Supplementary material for: In Vitro Propagation of an Endangered Helianthus verticillatus by Axillary Bud Proliferation
Source: MDPI journal article supplement (doi:10.3390/plants9060712), 2020-06-03
Supplement: s1 [file s1]

**Table S2.** Analysis of Variance (ANOVA) for the parameters examined for the axillary shoots elongation and rooting of *Helianthus verticillatus* on an auxin-free ½ MS (regeneration medium).

| Tested Parameters      | Variation Source  | Sum of Squares | F Value | P [Pr(>F)]    |
|------------------------|-------------------|----------------|---------|---------------|
| Stem length            | Genotype          | 141.20         | 11.1862 | 1.179e-09 *** |
|                        | BAP concentration | 37.86          | 14.9962 | 0.0001408 *** |
|                        | BAP × genotype    | 36.27          | 2.8736  | 0.0154555 *   |
| Root length            | Genotype          | 942.15         | 20.3398 | <2.2e-16 ***  |
|                        | BAP concentration | 67.12          | 7.2447  | 0.007638 **   |
|                        | BAP × genotype    | 165.73         | 3.5778  | 0.003907 **   |
| Number of roots        | Genotype          | 177.65         | 16.7613 | 4.265e-14 *** |
|                        | BAP concentration | 45.20          | 21.3214 | 4.265e-14 *** |
|                        | BAP × genotype    | 37.25          | 3.5142  | 0.00443 **    |
| Number of leaves       | Genotype          | 71.90          | 6.0214  | 2.956e-05 *** |
|                        | BAP concentration | 63.45          | 26.5688 | 5.509e-07 *** |
|                        | BAP × genotype    | 26.80          | 2.2446  | 0.05085 ns    |
| No of rooted plantlets | Genotype          | 12.421         | 16.342  | 8.96e-14 ***  |
|                        | BAP concentration | 0.003          | 0.018   | 0.8946 ns     |
|                        | BAP × genotype    | 0.313          | 0.412   | 0.8399 ns     |

\*—significant at  $p < 0.05$ ; \*\*—significant at  $p < 0.01$ ; \*\*\*—significant at  $p < 0.001$ ; ns—not significant.
