# Supplementary material for: In Vitro Propagation of an Endangered Helianthus verticillatus by Axillary Bud Proliferation
Source: MDPI journal article supplement (doi:10.3390/plants9060712), 2020-06-03
Supplement: s1 [file s1]

**Table S4.** Data obtained for genotyping of six donor plants of *Helianthus verticillatus* and their respective regenerants using SSRs.

| Plant         | Product Size (bp) |            |            |            |            |            |            |            |            |            |            |            |            |            |
|---------------|-------------------|------------|------------|------------|------------|------------|------------|------------|------------|------------|------------|------------|------------|------------|
|               | HV006             |            | HV012      |            | HV017      |            | HV033      |            | HV034      |            | HV037      |            | HV042      |            |
| <b>HV01.D</b> | <b>265</b>        | <b>265</b> | <b>337</b> | <b>337</b> | <b>108</b> | <b>108</b> | <b>265</b> | <b>265</b> | <b>154</b> | <b>154</b> | <b>160</b> | <b>176</b> | <b>368</b> | <b>368</b> |
| HV01.R1       | 265               | 265        | 337        | 337        | 108        | 108        | 265        | 265        | 154        | 154        | 160        | 176        | 368        | 368        |
| HV01.R2       | 265               | 265        | 337        | 337        | 108        | 108        | 265        | 265        | 154        | 154        | 160        | 176        | 368        | 368        |
| HV01.R3       | 265               | 265        | 337        | 337        | 108        | 108        | 265        | 265        | 154        | 154        | 160        | 176        | 368        | 368        |
| HV01.R4       | 265               | 265        | 337        | 337        | 108        | 108        | 265        | 265        | 154        | 154        | 160        | 176        | 368        | 368        |
| HV01.R5       | 265               | 265        | 337        | 337        | 108        | 108        | 265        | 265        | 154        | 154        | 160        | 176        | 368        | 368        |
| HV01.R6       | 265               | 265        | 337        | 337        | 108        | 108        | 265        | 265        | 154        | 154        | 160        | 176        | 368        | 368        |
| HV01.R7       | 265               | 265        | 337        | 337        | 108        | 108        | 265        | 265        | 154        | 154        | 160        | 176        | 368        | 368        |
| <b>HV04.D</b> | <b>265</b>        | <b>265</b> | <b>341</b> | <b>349</b> | <b>105</b> | <b>105</b> | <b>265</b> | <b>265</b> | <b>154</b> | <b>154</b> | <b>152</b> | <b>160</b> | <b>368</b> | <b>374</b> |
| HV04.R1       | 265               | 265        | 341        | 349        | 105        | 105        | 265        | 265        | 154        | 154        | 152        | 160        | 368        | 374        |
| HV04.R2       | 265               | 265        | 341        | 349        | 105        | 105        | 265        | 265        | 154        | 154        | 152        | 160        | 368        | 374        |
| HV04.R3       | 265               | 265        | 341        | 349        | 105        | 105        | 265        | 265        | 154        | 154        | 152        | 160        | 368        | 374        |
| HV04.R4       | 265               | 265        | 341        | 349        | 105        | 105        | 265        | 265        | 154        | 154        | 152        | 160        | 368        | 374        |
| HV04.R5       | 265               | 265        | 341        | 349        | 105        | 105        | 265        | 265        | 154        | 154        | 152        | 160        | 368        | 374        |
| HV04.R6       | 265               | 265        | 341        | 349        | 105        | 105        | 265        | 265        | 154        | 154        | 152        | 160        | 368        | 374        |
| HV04.R7       | 265               | 265        | 341        | 349        | 105        | 105        | 265        | 265        | 154        | 154        | 152        | 160        | 368        | 374        |
| <b>HV05.D</b> | <b>265</b>        | <b>265</b> | <b>341</b> | <b>341</b> | <b>108</b> | <b>108</b> | <b>265</b> | <b>265</b> | <b>158</b> | <b>158</b> | <b>160</b> | <b>176</b> | <b>368</b> | <b>374</b> |
| HV05.R1       | 265               | 265        | 341        | 341        | 108        | 108        | 265        | 265        | 158        | 158        | 160        | 176        | 368        | 374        |
| HV05.R2       | 265               | 265        | 341        | 341        | 108        | 108        | 265        | 265        | 158        | 158        | 160        | 176        | 368        | 374        |
| HV05.R3       | 265               | 265        | 341        | 341        | 108        | 108        | 265        | 265        | 158        | 158        | 160        | 176        | 368        | 374        |
| HV05.R4       | 265               | 265        | 341        | 341        | 108        | 108        | 265        | 265        | 158        | 158        | 160        | 176        | 368        | 374        |
| HV05.R5       | 265               | 265        | 341        | 341        | 108        | 108        | 265        | 265        | 158        | 158        | 160        | 176        | 368        | 374        |
| HV05.R6       | 265               | 265        | 341        | 341        | 108        | 108        | 265        | 265        | 158        | 158        | 160        | 176        | 368        | 374        |
| HV05.R7       | 265               | 265        | 341        | 341        | 108        | 108        | 265        | 265        | 158        | 158        | 160        | 176        | 368        | 374        |

D—donor plant; R1 to R7—regenerants obtained through axillary bud proliferation.

**Table S4.** Data obtained for genotyping of six donor plants of *Helianthus verticillatus* and their respective regenerants using SSRs (continue).

| Plant         | Product Size (bp) |            |            |            |            |            |            |            |            |            |            |            |            |            |
|---------------|-------------------|------------|------------|------------|------------|------------|------------|------------|------------|------------|------------|------------|------------|------------|
|               | HV006             |            | HV012      |            | HV017      |            | HV033      |            | HV034      |            | HV037      |            | HV042      |            |
| <b>HV10.D</b> | <b>265</b>        | <b>265</b> | <b>345</b> | <b>345</b> | <b>108</b> | <b>108</b> | <b>268</b> | <b>268</b> | <b>154</b> | <b>154</b> | <b>152</b> | <b>160</b> | <b>374</b> | <b>374</b> |
| HV10.R1       | 265               | 265        | 345        | 345        | 108        | 108        | 268        | 268        | 154        | 154        | 152        | 160        | 374        | 374        |
| HV10.R2       | 265               | 265        | 345        | 345        | 108        | 108        | 268        | 268        | 154        | 154        | 152        | 160        | 374        | 374        |
| HV10.R3       | 265               | 265        | 345        | 345        | 108        | 108        | 268        | 268        | 154        | 154        | 152        | 160        | 374        | 374        |
| HV10.R4       | 265               | 265        | 345        | 345        | 108        | 108        | 268        | 268        | 154        | 154        | 152        | 160        | 374        | 374        |
| HV10.R5       | 265               | 265        | 345        | 345        | 108        | 108        | 268        | 268        | 154        | 154        | 152        | 160        | 374        | 374        |
| HV10.R6       | 265               | 265        | 345        | 345        | 108        | 108        | 268        | 268        | 154        | 154        | 152        | 160        | 374        | 374        |
| HV10.R7       | 265               | 265        | 345        | 345        | 108        | 108        | 268        | 268        | 154        | 154        | 152        | 160        | 374        | 374        |
| <b>HV13.D</b> | <b>230</b>        | <b>265</b> | <b>341</b> | <b>349</b> | <b>105</b> | <b>105</b> | <b>268</b> | <b>268</b> | <b>154</b> | <b>162</b> | <b>152</b> | <b>176</b> | <b>368</b> | <b>374</b> |
| HV13.R1       | 230               | 265        | 341        | 349        | 105        | 105        | 268        | 268        | 154        | 162        | 152        | 176        | 368        | 374        |
| HV13.R2       | 230               | 265        | 341        | 349        | 105        | 105        | 268        | 268        | 154        | 162        | 152        | 176        | 368        | 374        |
| HV13.R3       | 230               | 265        | 341        | 349        | 105        | 105        | 268        | 268        | 154        | 162        | 152        | 176        | 368        | 374        |
| HV13.R4       | 230               | 265        | 341        | 349        | 105        | 105        | 268        | 268        | 154        | 162        | 152        | 176        | 368        | 374        |
| HV13.R5       | 230               | 265        | 341        | 349        | 105        | 105        | 268        | 268        | 154        | 162        | 152        | 176        | 368        | 374        |
| HV13.R6       | 230               | 265        | 341        | 349        | 105        | 105        | 268        | 268        | 154        | 162        | 152        | 176        | 368        | 374        |
| HV13.R7       | 230               | 265        | 341        | 349        | 105        | 105        | 268        | 268        | 154        | 162        | 152        | 176        | 368        | 374        |
| <b>HV18.D</b> | <b>265</b>        | <b>265</b> | <b>341</b> | <b>345</b> | <b>108</b> | <b>108</b> | <b>265</b> | <b>265</b> | <b>154</b> | <b>162</b> | <b>152</b> | <b>176</b> | <b>368</b> | <b>368</b> |
| HV18.R1       | 265               | 265        | 341        | 345        | 108        | 108        | 265        | 265        | 154        | 162        | 152        | 176        | 368        | 368        |
| HV18.R2       | 265               | 265        | 341        | 345        | 108        | 108        | 265        | 265        | 154        | 162        | 152        | 176        | 368        | 368        |
| HV18.R3       | 265               | 265        | 341        | 345        | 108        | 108        | 265        | 265        | 154        | 162        | 152        | 176        | 368        | 368        |
| HV18.R4       | 265               | 265        | 341        | 345        | 108        | 108        | 265        | 265        | 154        | 162        | 152        | 176        | 368        | 368        |
| HV18.R5       | 265               | 265        | 341        | 345        | 108        | 108        | 265        | 265        | 154        | 162        | 152        | 176        | 368        | 368        |
| HV18.R6       | 265               | 265        | 341        | 345        | 108        | 108        | 265        | 265        | 154        | 162        | 152        | 176        | 368        | 368        |
| HV18.R7       | 265               | 265        | 341        | 345        | 108        | 108        | 265        | 265        | 154        | 162        | 152        | 176        | 368        | 368        |

D—donor plant; R1 to R7—regenerants obtained through axillary bud proliferation.

**Table S4.** Data obtained for genotyping of six donor plants of *Helianthus verticillatus* and their respective regenerants using SSRs (continue).

| Plant         | Product Size (bp) |            |            |            |            |            |            |            |            |            |            |            |            |            |
|---------------|-------------------|------------|------------|------------|------------|------------|------------|------------|------------|------------|------------|------------|------------|------------|
|               | HV024             |            | HV026      |            | HV028      |            | HV031      |            | HV041      |            | HV046      |            | HV048      |            |
| <b>HV01.D</b> | <b>360</b>        | <b>360</b> | <b>296</b> | <b>296</b> | <b>119</b> | <b>119</b> | <b>424</b> | <b>424</b> | <b>190</b> | <b>190</b> | <b>317</b> | <b>317</b> | <b>224</b> | <b>224</b> |
| HV01.R1       | 360               | 360        | 296        | 296        | 119        | 119        | 424        | 424        | 190        | 190        | 317        | 317        | 224        | 224        |
| HV01.R2       | 360               | 360        | 296        | 296        | 119        | 119        | 424        | 424        | 190        | 190        | 317        | 317        | 224        | 224        |
| HV01.R3       | 360               | 360        | 296        | 296        | 119        | 119        | 424        | 424        | 190        | 190        | 317        | 317        | 224        | 224        |
| HV01.R4       | 360               | 360        | 296        | 296        | 119        | 119        | 424        | 424        | 190        | 190        | 317        | 317        | 224        | 224        |
| HV01.R5       | 360               | 360        | 296        | 296        | 119        | 119        | 424        | 424        | 190        | 190        | 317        | 317        | 224        | 224        |
| HV01.R6       | 360               | 360        | 296        | 296        | 119        | 119        | 424        | 424        | 190        | 190        | 317        | 317        | 224        | 224        |
| HV01.R7       | 360               | 360        | 296        | 296        | 119        | 119        | 424        | 424        | 190        | 190        | 317        | 317        | 224        | 224        |
| <b>HV04.D</b> | <b>360</b>        | <b>360</b> | <b>296</b> | <b>296</b> | <b>119</b> | <b>119</b> | <b>424</b> | <b>424</b> | <b>190</b> | <b>190</b> | <b>317</b> | <b>317</b> | <b>224</b> | <b>224</b> |
| HV04.R1       | 360               | 360        | 296        | 296        | 119        | 119        | 424        | 424        | 190        | 190        | 317        | 317        | 224        | 224        |
| HV04.R2       | 360               | 360        | 296        | 296        | 119        | 119        | 424        | 424        | 190        | 190        | 317        | 317        | 224        | 224        |
| HV04.R3       | 360               | 360        | 296        | 296        | 119        | 119        | 424        | 424        | 190        | 190        | 317        | 317        | 224        | 224        |
| HV04.R4       | 360               | 360        | 296        | 296        | 119        | 119        | 424        | 424        | 190        | 190        | 317        | 317        | 224        | 224        |
| HV04.R5       | 360               | 360        | 296        | 296        | 119        | 119        | 424        | 424        | 190        | 190        | 317        | 317        | 224        | 224        |
| HV04.R6       | 360               | 360        | 296        | 296        | 119        | 119        | 424        | 424        | 190        | 190        | 317        | 317        | 224        | 224        |
| HV04.R7       | 360               | 360        | 296        | 296        | 119        | 119        | 424        | 424        | 190        | 190        | 317        | 317        | 224        | 224        |
| <b>HV05.D</b> | <b>360</b>        | <b>360</b> | <b>296</b> | <b>296</b> | <b>119</b> | <b>119</b> | <b>424</b> | <b>424</b> | <b>190</b> | <b>190</b> | <b>317</b> | <b>317</b> | <b>224</b> | <b>224</b> |
| HV05.R1       | 360               | 360        | 296        | 296        | 119        | 119        | 424        | 424        | 190        | 190        | 317        | 317        | 224        | 224        |
| HV05.R2       | 360               | 360        | 296        | 296        | 119        | 119        | 424        | 424        | 190        | 190        | 317        | 317        | 224        | 224        |
| HV05.R3       | 360               | 360        | 296        | 296        | 119        | 119        | 424        | 424        | 190        | 190        | 317        | 317        | 224        | 224        |
| HV05.R4       | 360               | 360        | 296        | 296        | 119        | 119        | 424        | 424        | 190        | 190        | 317        | 317        | 224        | 224        |
| HV05.R5       | 360               | 360        | 296        | 296        | 119        | 119        | 424        | 424        | 190        | 190        | 317        | 317        | 224        | 224        |
| HV05.R6       | 360               | 360        | 296        | 296        | 119        | 119        | 424        | 424        | 190        | 190        | 317        | 317        | 224        | 224        |
| HV05.R7       | 360               | 360        | 296        | 296        | 119        | 119        | 424        | 424        | 190        | 190        | 317        | 317        | 224        | 224        |

D—donor plant; R1 to R7—regenerants obtained through axillary bud proliferation.

**Table S4.** Data obtained for genotyping of six donor plants of *Helianthus verticillatus* and their respective regenerants using SSRs (continue).

| Plant         | Product Size (bp) |            |            |            |            |            |            |            |            |            |            |            |            |            |
|---------------|-------------------|------------|------------|------------|------------|------------|------------|------------|------------|------------|------------|------------|------------|------------|
|               | HV024             |            | HV026      |            | HV028      |            | HV031      |            | HV041      |            | HV046      |            | HV048      |            |
| <b>HV10.D</b> | <b>360</b>        | <b>360</b> | <b>296</b> | <b>296</b> | <b>119</b> | <b>119</b> | <b>424</b> | <b>424</b> | <b>190</b> | <b>190</b> | <b>317</b> | <b>317</b> | <b>224</b> | <b>224</b> |
| HV10.R1       | 360               | 360        | 296        | 296        | 119        | 119        | 424        | 424        | 190        | 190        | 317        | 317        | 224        | 224        |
| HV10.R2       | 360               | 360        | 296        | 296        | 119        | 119        | 424        | 424        | 190        | 190        | 317        | 317        | 224        | 224        |
| HV10.R3       | 360               | 360        | 296        | 296        | 119        | 119        | 424        | 424        | 190        | 190        | 317        | 317        | 224        | 224        |
| HV10.R4       | 360               | 360        | 296        | 296        | 119        | 119        | 424        | 424        | 190        | 190        | 317        | 317        | 224        | 224        |
| HV10.R5       | 360               | 360        | 296        | 296        | 119        | 119        | 424        | 424        | 190        | 190        | 317        | 317        | 224        | 224        |
| HV10.R6       | 360               | 360        | 296        | 296        | 119        | 119        | 424        | 424        | 190        | 190        | 317        | 317        | 224        | 224        |
| HV10.R7       | 360               | 360        | 296        | 296        | 119        | 119        | 424        | 424        | 190        | 190        | 317        | 317        | 224        | 224        |
| <b>HV13.D</b> | <b>360</b>        | <b>360</b> | <b>296</b> | <b>296</b> | <b>119</b> | <b>119</b> | <b>424</b> | <b>424</b> | <b>190</b> | <b>190</b> | <b>317</b> | <b>317</b> | <b>224</b> | <b>224</b> |
| HV13.R1       | 360               | 360        | 296        | 296        | 119        | 119        | 424        | 424        | 190        | 190        | 317        | 317        | 224        | 224        |
| HV13.R2       | 360               | 360        | 296        | 296        | 119        | 119        | 424        | 424        | 190        | 190        | 317        | 317        | 224        | 224        |
| HV13.R3       | 360               | 360        | 296        | 296        | 119        | 119        | 424        | 424        | 190        | 190        | 317        | 317        | 224        | 224        |
| HV13.R4       | 360               | 360        | 296        | 296        | 119        | 119        | 424        | 424        | 190        | 190        | 317        | 317        | 224        | 224        |
| HV13.R5       | 360               | 360        | 296        | 296        | 119        | 119        | 424        | 424        | 190        | 190        | 317        | 317        | 224        | 224        |
| HV13.R6       | 360               | 360        | 296        | 296        | 119        | 119        | 424        | 424        | 190        | 190        | 317        | 317        | 224        | 224        |
| HV13.R7       | 360               | 360        | 296        | 296        | 119        | 119        | 424        | 424        | 190        | 190        | 317        | 317        | 224        | 224        |
| <b>HV18.D</b> | <b>360</b>        | <b>360</b> | <b>296</b> | <b>296</b> | <b>119</b> | <b>119</b> | <b>424</b> | <b>424</b> | <b>190</b> | <b>190</b> | <b>317</b> | <b>317</b> | <b>224</b> | <b>224</b> |
| HV18.R1       | 360               | 360        | 296        | 296        | 119        | 119        | 424        | 424        | 190        | 190        | 317        | 317        | 224        | 224        |
| HV18.R2       | 360               | 360        | 296        | 296        | 119        | 119        | 424        | 424        | 190        | 190        | 317        | 317        | 224        | 224        |
| HV18.R3       | 360               | 360        | 296        | 296        | 119        | 119        | 424        | 424        | 190        | 190        | 317        | 317        | 224        | 224        |
| HV18.R4       | 360               | 360        | 296        | 296        | 119        | 119        | 424        | 424        | 190        | 190        | 317        | 317        | 224        | 224        |
| HV18.R5       | 360               | 360        | 296        | 296        | 119        | 119        | 424        | 424        | 190        | 190        | 317        | 317        | 224        | 224        |
| HV18.R6       | 360               | 360        | 296        | 296        | 119        | 119        | 424        | 424        | 190        | 190        | 317        | 317        | 224        | 224        |
| HV18.R7       | 360               | 360        | 296        | 296        | 119        | 119        | 424        | 424        | 190        | 190        | 317        | 317        | 224        | 224        |

D—donor plant; R1 to R7—regenerants obtained through axillary bud proliferation.
